# Supplementary material for: The Biochemical Role of the Human NEIL1 and NEIL3 DNA Glycosylases on Model DNA Replication Forks
Source: MDPI journal article supplement (doi:10.3390/genes10040315), 2019-04-23
Supplement: s1 [file s1]

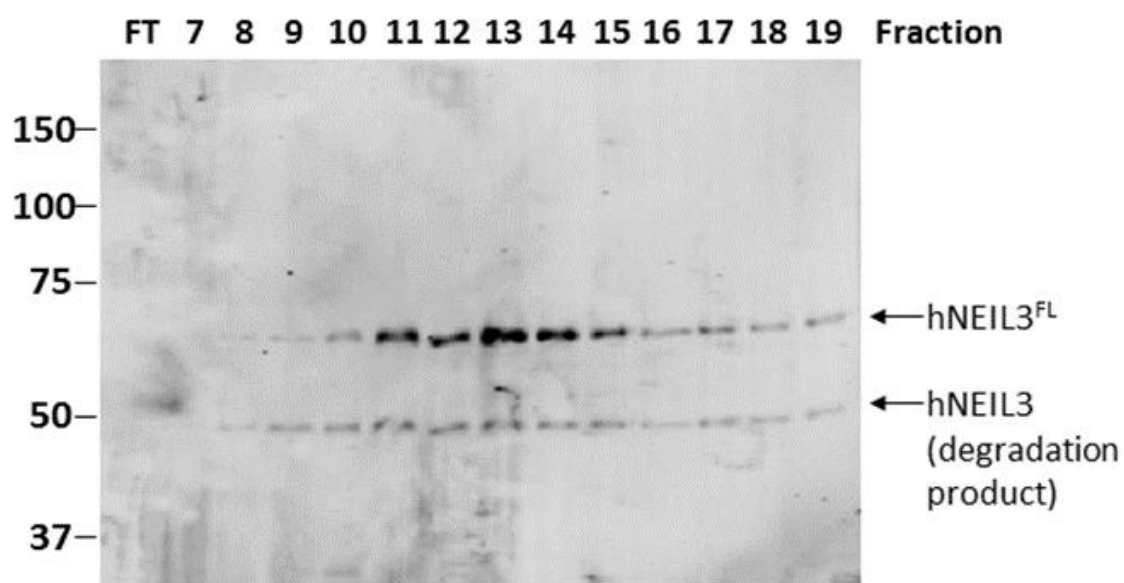

**Figure S1.** Anti-His Western blot analysis of the flow-through (FT) and fractions 7–19 of hNEIL3<sup>FL</sup> separated by FPLC on a Mono S 5/50 GL column.
